# Supplementary material
Source: PubMed Central journal article supplement (PMC1681481)
Supplement: msb4100049-s2.pdf [file msb4100049-s2.pdf]

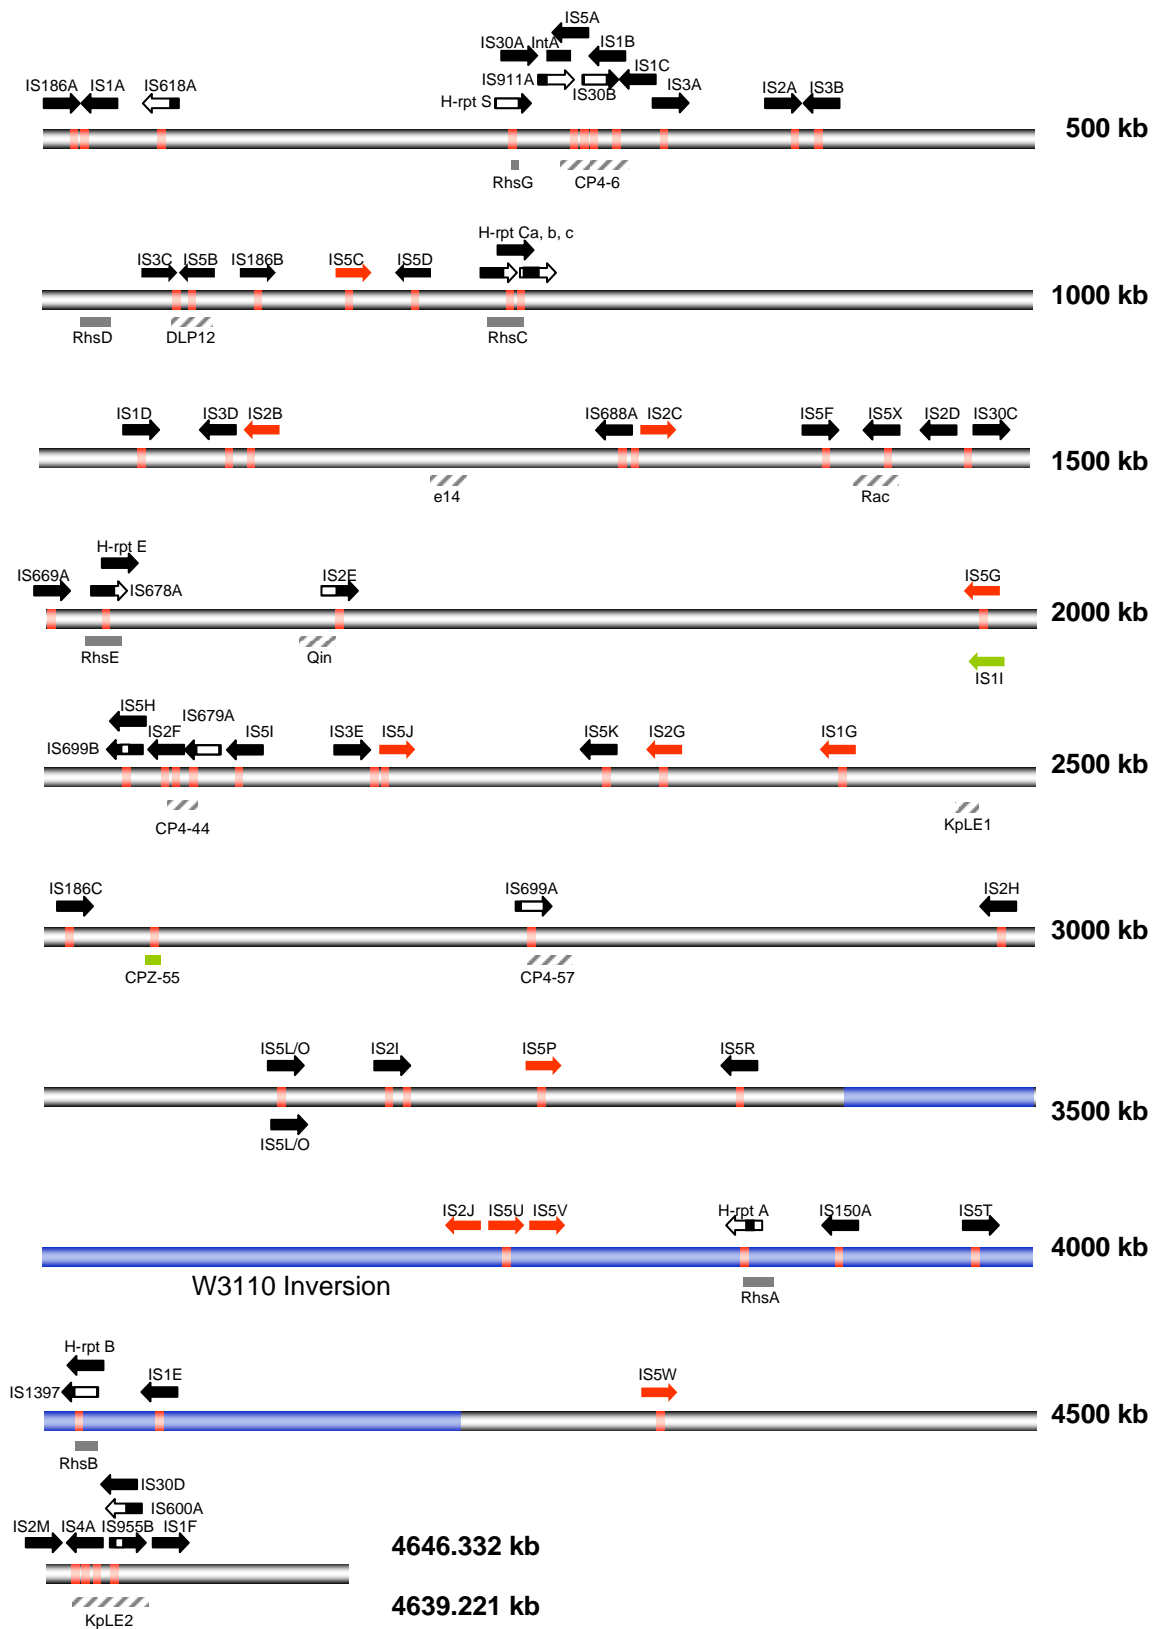

Supplementary Figure 1. IS elements and defective phages in *E. coli* K-12 MG1655 and W3110. IS elements in common (black arrows). Defective phages in common (solid or striped grey bars). MG1655-specific ones (green arrows or bar). W3110-specific ones (orange arrows). W3110 inversion (blue bar).
